# Supplementary material
Source: PubMed Central journal article supplement (PMC3259779)

## Supplemental information

**Kabuta et al.**

**Title: Aberrant interaction between Parkinson's disease-associated mutant UCH-L1 and the lysosomal receptor for chaperone-mediated autophagy**

### Experimental Procedures

**Plasmids.** The expression plasmids pCI-neo-hLAMP-2A, containing human WT LAMP-2A, and pCI-neo-hLAMP-2A $\Delta$ C, containing LAMP-2A in which C-terminal cytosolic region was substituted by HA tag, were constructed using the pCI-neo mammalian expression vector.

**siRNA preparation and transfection.** A double-stranded short interfering RNA (siRNA) targeting LAMP-2 was purchased from RNAi Co., Ltd. (Tokyo, Japan). Sequences targeted by siRNA were selected using siDirect (RNAi Co., Ltd): sense (5'-CUUAUAUGUGCAACAAAGAGC-3') and antisense (5'-UCUUUGUUGCACAUUAAGAA-3'). EGFP siRNA (1) was used as a control. Cells were transfected with siRNA using X-tremeGENE siRNA Transfection Reagent (Roche Diagnostics).

### REFERENCES

1. Kabuta, T., Suzuki, Y., and Wada, K. (2006) *J. Biol. Chem.* **281**, 30524-30533

### FIGURE LEGENDS

**Figure S1 (A)** Cytosolic and lysosomal fractions were prepared and immunoblotted with anti-LAMP-2 and  $\beta$ -tubulin antibodies. **(B, C)** Specificity of the anti-LAMP-2A antibody. COS-7 cells were transfected with the indicated constructs (control: empty vector) (B). Cell lysates were prepared and immunoblotted using anti-LAMP-2A, LAMP-2 and  $\beta$ -actin antibodies (B). COS-7 cells were transfected with the indicated siRNAs (C). Cell lysates were prepared and analyzed by immunoblotting using anti-LAMP-2A, LAMP-2 and  $\beta$ -actin antibodies (C).

**Figure S2 (A)** Lysates of COS-7 cells transfected with the indicated constructs (Control: empty vector) were immunoprecipitated with anti-FLAG antibody, and analyzed by immunoblotting. **(B)** COS-7 cells were transfected with the indicated constructs. Cell lysates were prepared and immunoblotted with anti- $\alpha$ -synuclein, UCH-L1 and  $\beta$ -actin antibodies.

**A**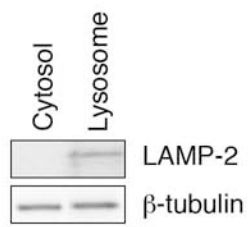**B**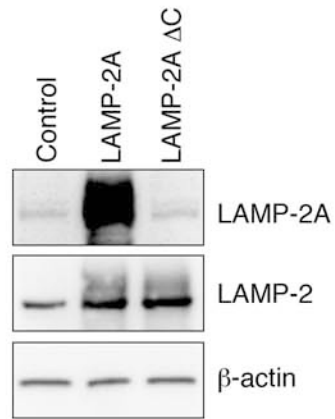**C**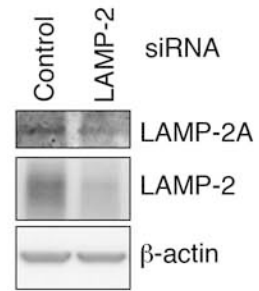

**A**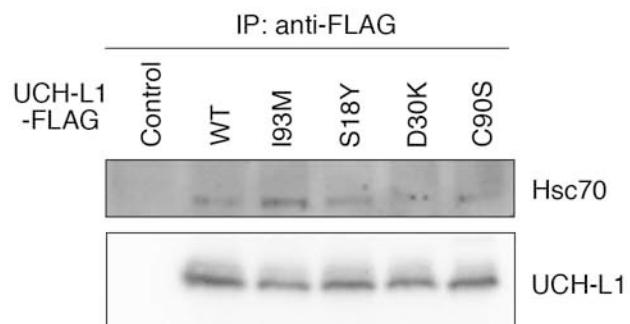**B**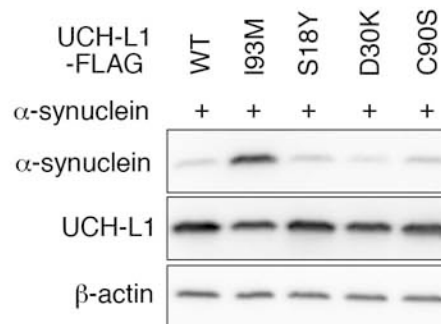

Supplement: supp_M801918200_suppdata.pdf [file supp_M801918200_suppdata.pdf]
